# Supplementary material for: Combining Yoga Exercise with Rehabilitation Improves Balance and Depression in Patients with Chronic Stroke: A Controlled Trial
Source: MDPI journal article supplement (doi:10.3390/app12020922), 2022-01-17
Supplement: s1 [file s1]

Archive with 1 entries (1 files):
- applsci-1513729-supplementary.pdf
