# Supplementary material for: Combining Yoga Exercise with Rehabilitation Improves Balance and Depression in Patients with Chronic Stroke: A Controlled Trial
Source: MDPI journal article supplement (doi:10.3390/app12020922), 2022-01-17
Supplement: s1 [file s1 › applsci-1513729-supplementary.pdf]

# Combining Yoga Exercise with Rehabilitation Improves Balance and Depression in Patients with Chronic Stroke: A Controlled Trial

Yen-Ting Lai <sup>1,2,3</sup>, Chien-Hung Lin <sup>4,5,6</sup>, City C. Hsieh <sup>7</sup>, Jung-Cheng Yang <sup>2,3</sup>, Han-Hsing Tsou <sup>8</sup>, Chih-Ching Lin <sup>4,9</sup>, Szu-Yuan Li <sup>4,9</sup>, Hsiang-Lin Chan <sup>10,†</sup> and Wen-Sheng Liu <sup>4,6,8,11,12,†,\*</sup>

<sup>1</sup> Department of Physical Medicine and Rehabilitation, National Taiwan University College of Medicine, Taipei 100, Taiwan; csmclaiyt@gmail.com

<sup>2</sup> Department of Physical Medicine and Rehabilitation, National Taiwan University Hospital Hsin-Chu Branch, Hsinchu 300, Taiwan; w3yjcw@gmail.com

<sup>3</sup> Department of Physical Medicine and Rehabilitation, National Taiwan University Hsin-Chu Hospital, Hsinchu 300, Taiwan

<sup>4</sup> Faculty of Medicine, School of Medicine, National Yang Ming Chiao Tung University, Hsinchu 300, Taiwan; chlin5@vghtpe.gov.tw (C.-H.L.); linc2@vghtpe.gov.tw (C.-C.L.); syli@vghtpe.gov.tw (S.-Y.L.) dat23@tpech.gov.tw (W.-S., L)

<sup>5</sup> Department of Pediatrics, Taipei Veterans General Hospital, Taipei 112, Taiwan

<sup>6</sup> College of Science and Engineering, Fu Jen Catholic University, New Taipei City 242, Taiwan

<sup>7</sup> Department of Kinesiology, National Tsing Hua University, Hsinchu 300, Taiwan; chsieh@mail.nd.nthu.edu.tw

<sup>8</sup> Institute of Food Safety and Health Risk Assessment, National Yang Ming Chiao Tung University, Taipei 112, Taiwan; hhtsou@nycu.edu.tw

<sup>9</sup> Institute of Food Safety and Health Risk Assessment, National Yang-Ming University, Taipei 112, Taiwan

<sup>10</sup> Kim Forest Enterprise Co., Ltd., New Taipei City 221, Taiwan

<sup>11</sup> Division of Nephrology, and Department of Medicine, Taipei Veterans General Hospital, Taipei 112, Taiwan

<sup>12</sup> Department of Child Psychiatry, Chang Gung Memorial Hospital and University, Taoyuan 333, Taiwan; ivyhlin70@kimo.com

<sup>13</sup> Division of Nephrology, Department of Medicine, Taipei City Hospital, Zhongxing Branch, Taipei 103, Taiwan

<sup>14</sup> Department of Special Education, University of Taipei, Taipei 100, Taiwan

\* Correspondence: dat23@tpech.gov.tw; Tel.: +886-2-979305704

† These authors contributed equally to this manuscript.

Frequency: 3 sessions in each week. Duration: Time: 60 minutes in each session.

Training program includes:

- i. Resistance exercise: weight-bearing training to increase the muscle strength of the lower limbs, such as repeated sit-to-stand training, or the use of equipment to achieve the goal (such as progressive resistance training machines or stationary bicycles.)
- ii. Repetitive task-oriented trainings (including dynamic balance exercises and weight-shift training): sit-to-stand training, transfer, ambulation and going up and down stairs training.
- iii. The physiotherapist who chooses 3–4 types of exercises from the following types of exercise. Perform each repeat each types of exercise 15 to 20 minutes.

**Table S1.** Standard stroke rehabilitation.

| Types                 | Photo                                                                               |
|-----------------------|-------------------------------------------------------------------------------------|
| sit-to-stand training | 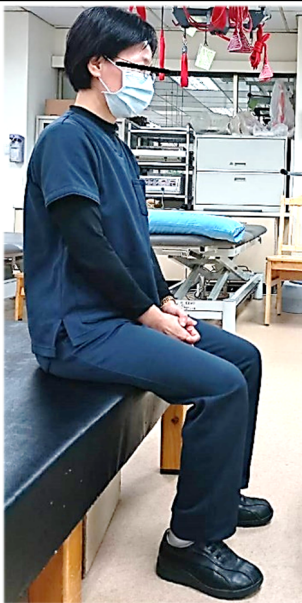   |
|                       | 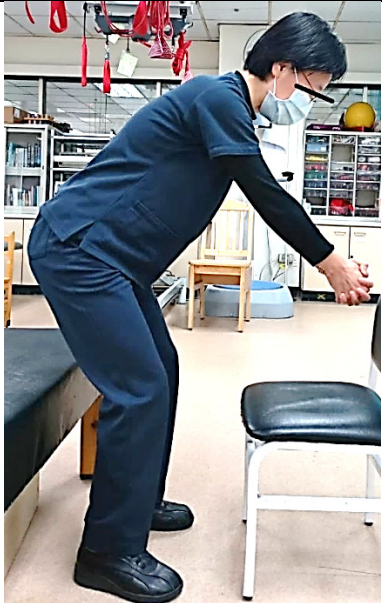  |
|                       | 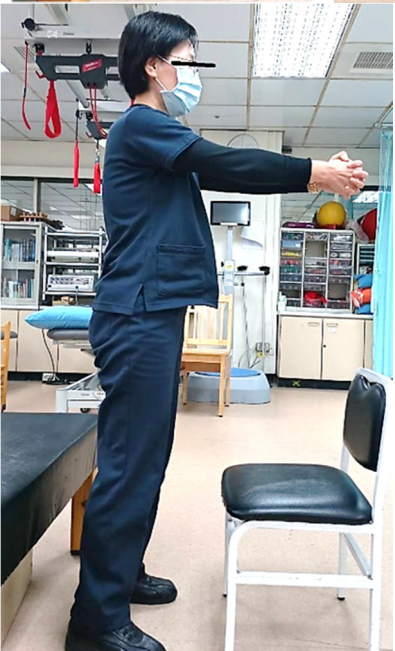  |
|                       | 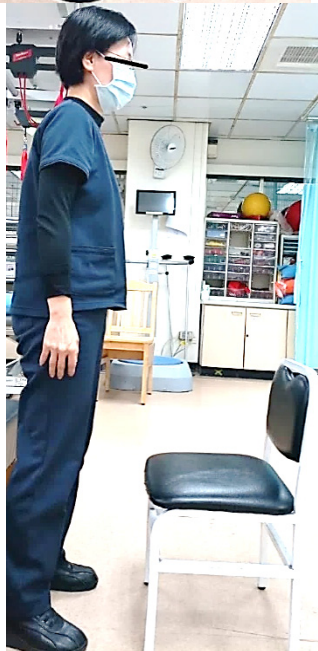 |

progressive  
resistance training  
machines

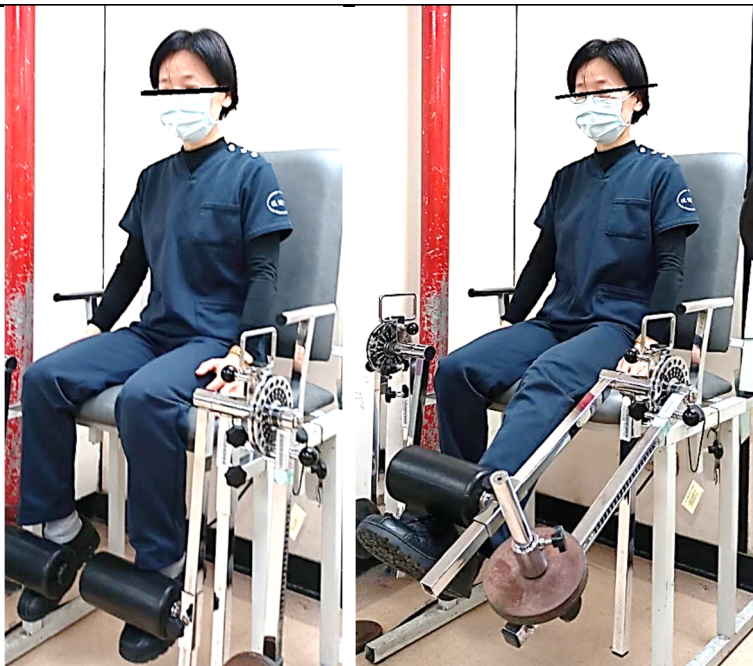

stationary bicycles

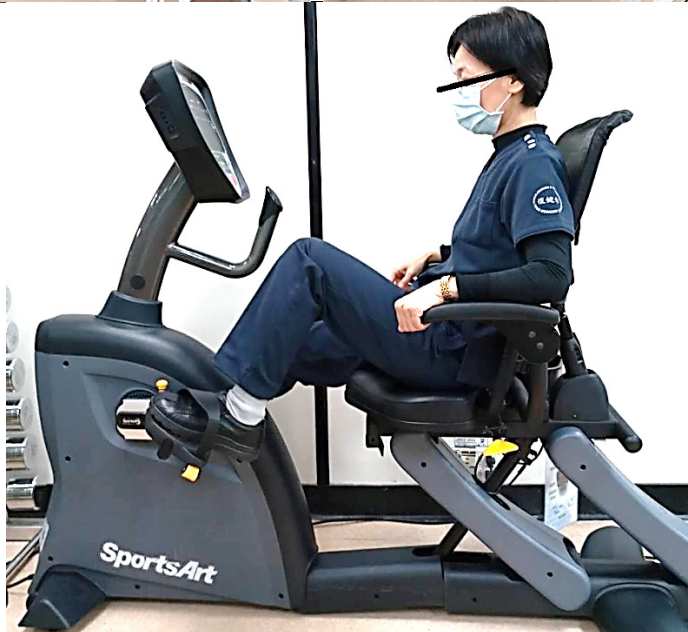

ambulation

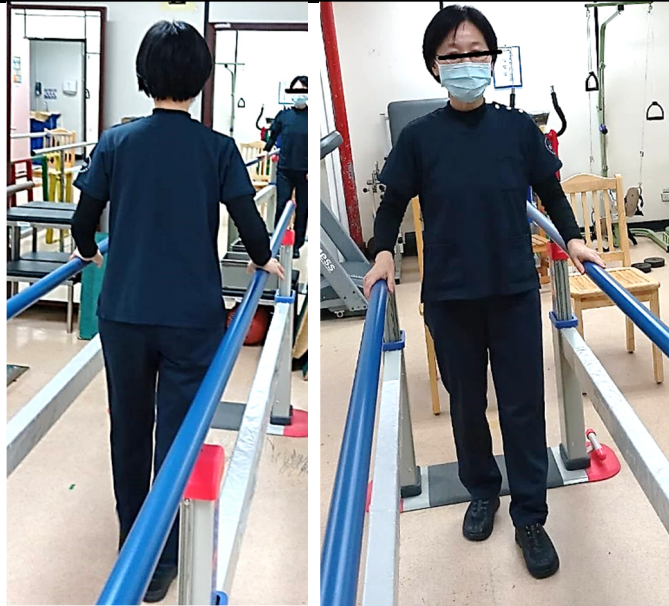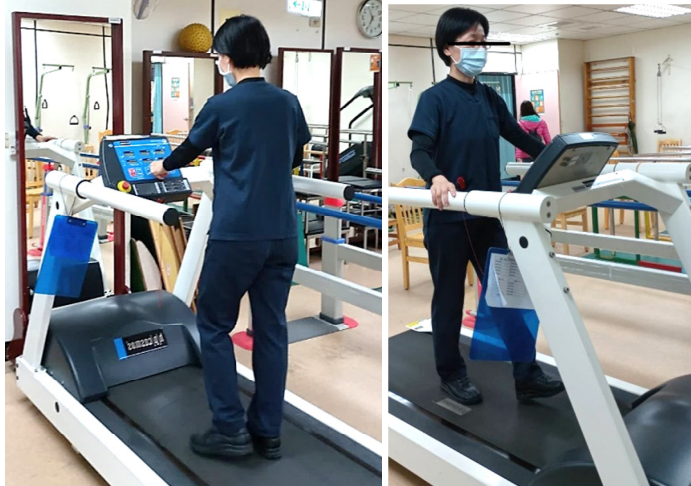

going up and down  
stairs

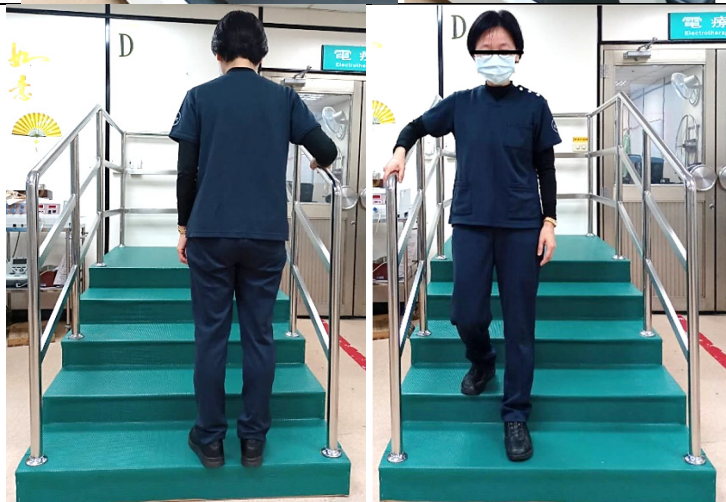

#### Yoga Class schedule (12 Basic Yoga Pose)

1. All session begins with warm-up(10 minutes) and ends with cold-down(10 minutes):  
Corpse Pose, mindfulness meditation, deeper/rhythmic breathing  
practice(inspiration/expiration time around 1:2).

2. Main activities(40 minutes): The yoga teacher who chooses 8-11 pose from the following [ 12 Basic Yoga Pose] .In each class, each yoga pose is held for 10-60 seconds followed by 10-20 seconds of rest. Perform each yoga pose 3 to 5 times.

All yoga sessions start with supine spinal twist pose (S) and end with modified tree pose. (T)

**Table S2.** Yoga class schedule (16 yoga sessions) in each week.

| week | Course content(main activity)*                                                                                                                                                                 |
|------|------------------------------------------------------------------------------------------------------------------------------------------------------------------------------------------------|
| 1    | S., knee to chest p., bridge p., cobra p., cat p., cow p., modified balancing table p., hare p., T                                                                                             |
| 2    | S., knee to chest p., bridge p., cobra p., cat p., cow p., hero p., T                                                                                                                          |
| 3    | S., bridge p., cobra p., cat p., cow p., modified balancing table p., hero p., modified boat p. with integrating resistance bands, hare p., T                                                  |
| 4    | S., knee to chest p., bridge p., cobra p., cat p., cow p., kneeling p. with balancing on one knee, T                                                                                           |
| 5    | S., bridge p. with integrating resistance bands, cobra p., cat p., cow p., hero p., kneeling p. with balancing on one knee, hare p., T                                                         |
| 6    | S., knee to chest p. with integrating resistance bands, bridge p., cobra p., cat p., cow p., kneeling p. with balancing on one knee, modified boat p. with integrating resistance bands, T     |
| 7    | S., knee to chest p., bridge p., cobra p., cat p., cow p., kneeling p. with balancing on one knee, modified boat p. with integrating resistance bands hare p., T                               |
| 8    | S., knee to chest p., cobra p., cat p., cow p., kneeling p. with balancing on one knee, hare p., T                                                                                             |
| 9    | S., bridge p., cobra p., cat p., cow p., hero p., modified boat p. with integrating resistance bands, hare p., T                                                                               |
| 10   | S., cobra p., cat p., cow p., kneeling p. with balancing on one knee, modified boat p. with integrating resistance bands, hare p., T                                                           |
| 11   | S., cobra p., cat p., cow p., modified balancing table p., hero p., hare p., T                                                                                                                 |
| 12   | S., knee to chest p., bridge p., cobra p., cat p., cow p., modified boat p. with integrating resistance bands, hare p.                                                                         |
| 13   | S., knee to chest p., bridge p., cobra p., cat p., cow p., modified balancing table p., modified boat p. with integrating resistance bands, T                                                  |
| 14   | S., cobra p., cat p., cow p., hero p., modified boat p. with integrating resistance bands, hare p., T                                                                                          |
| 15   | S., bridge p., cobra p., cat p., cow p., hero p., modified boat p. with integrating resistance bands, T                                                                                        |
| 16   | S., knee to chest p., bridge p., cobra p., cat p., cow p., modified balancing table p., kneeling p. with balancing on one knee, modified boat p. with integrating resistance bands, hare p., T |

\* pose (p.)

See below for a further detailed description of Yoga class schedule and each position.

**Table S3.** Yoga pose.

| Number | Position | Photo                                                                                | Yoga P.                                                             |
|--------|----------|--------------------------------------------------------------------------------------|---------------------------------------------------------------------|
| 1      |          | 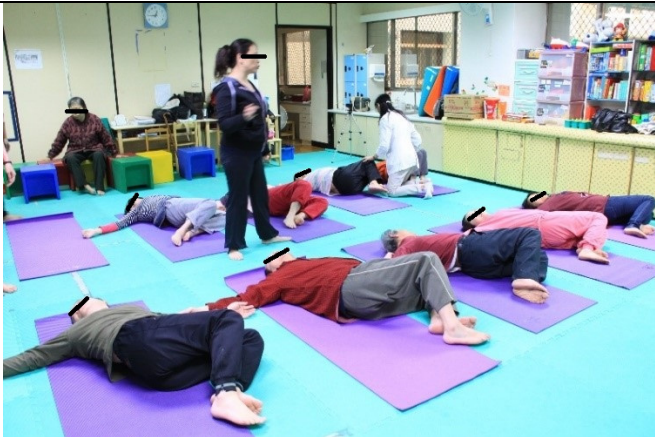   | supine spinal twist<br>p.                                           |
| 2      | Supine   | 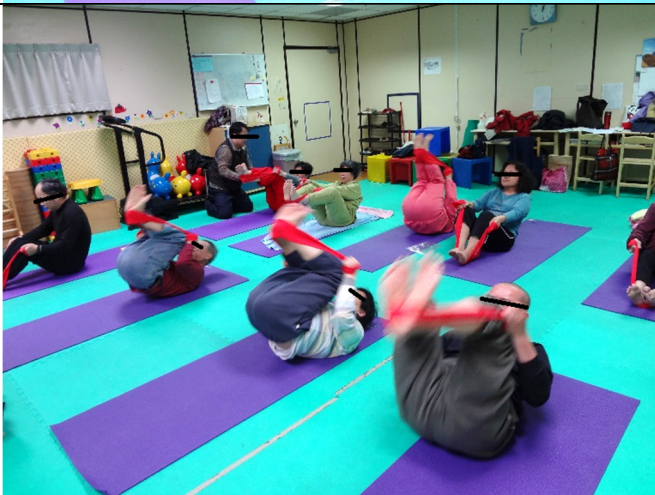  | knee to chest p.<br>with/without<br>integrating<br>resistance bands |
| 3      |          | 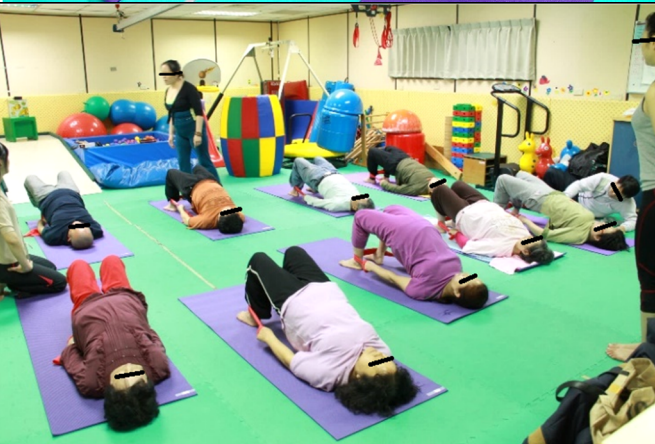 | bridge p.<br>with/without<br>integrating<br>resistance bands        |

4 Prone

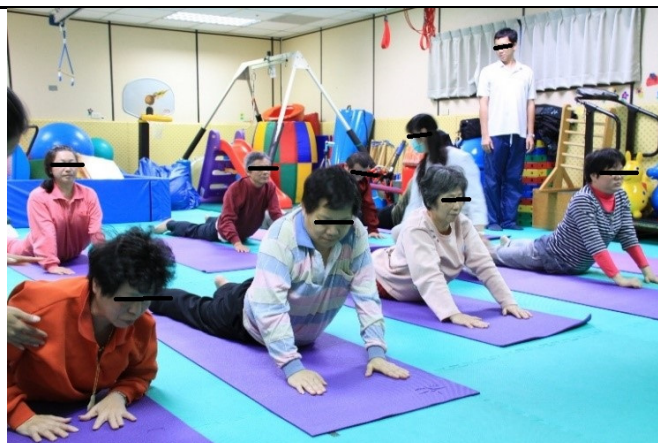

cobra p.

5

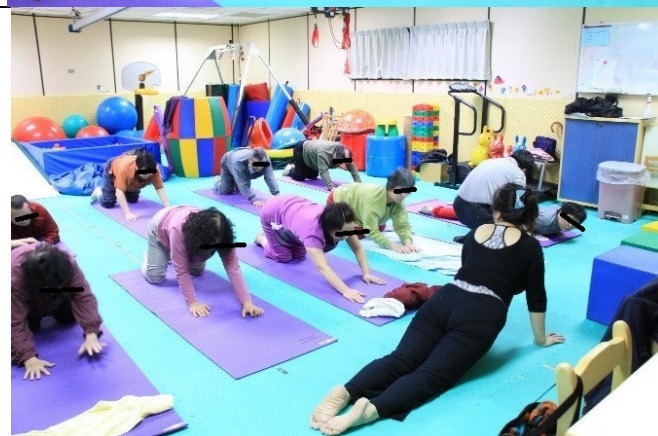

cat p.

6 Mat  
exercise

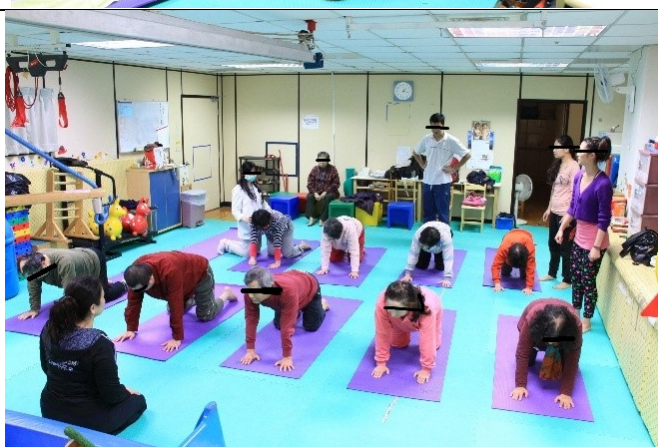

cow p.

7

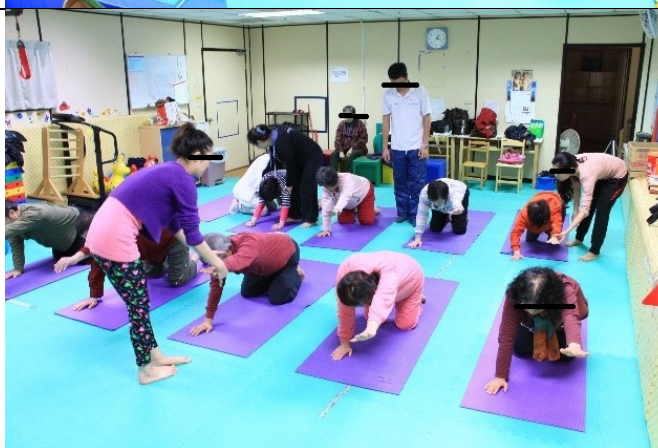

modified balancing  
table p.

8

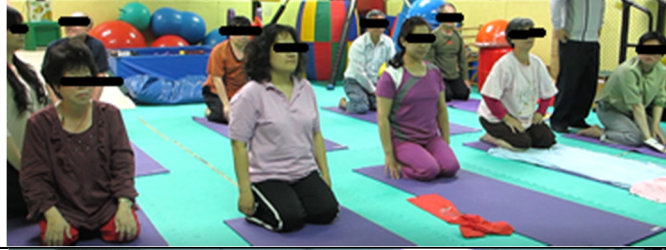

hero p.

9

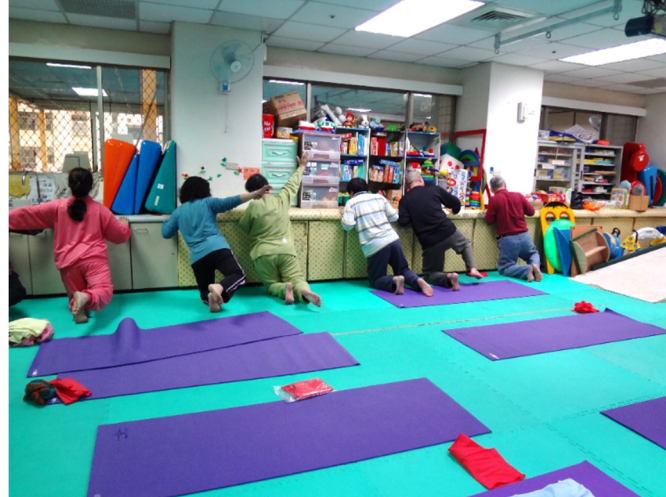

kneeling p. with  
balancing on one  
knee

Seated

10

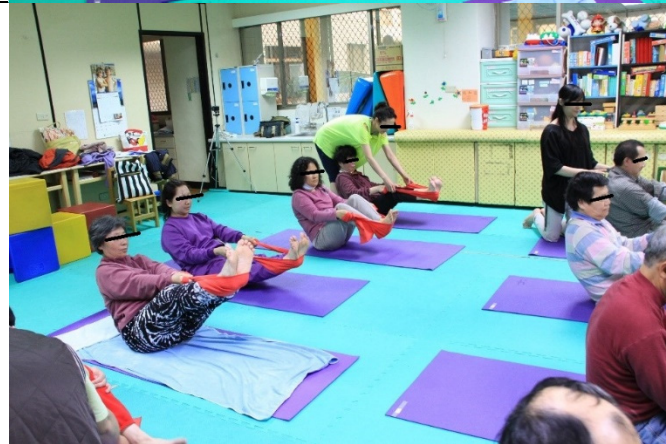

modified boat p.  
with integrating  
resistance bands

11

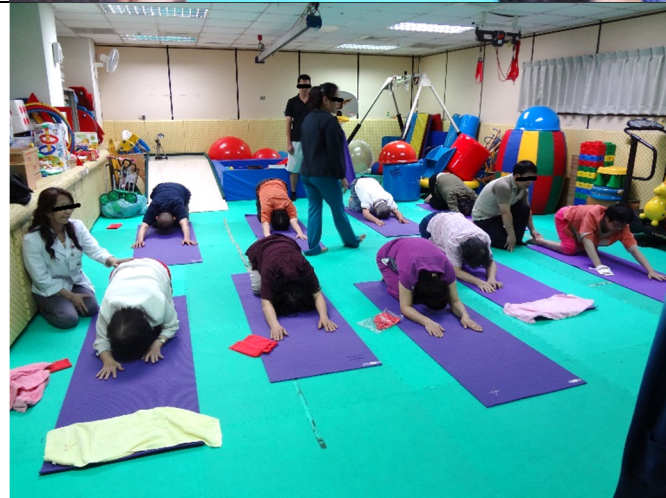

hare p.

12 Standing

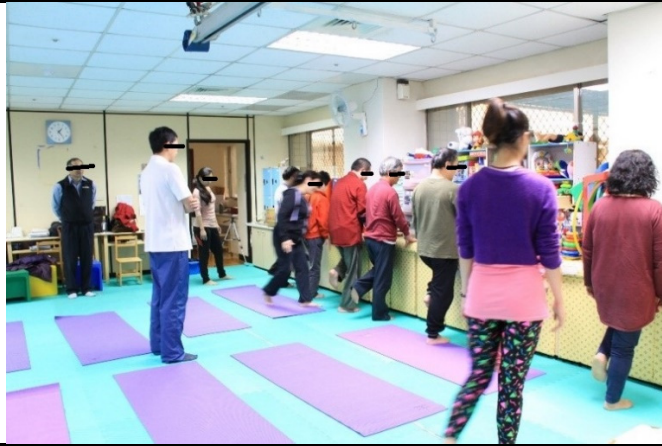

modified tree p.
